# Supplementary material for: The Saccharina latissima microbiome: Effects of region, season, and physiology
Source: Front Microbiol. 2023 Jan 6;13:1050939. doi: 10.3389/fmicb.2022.1050939 (PMC9858215; doi:10.3389/fmicb.2022.1050939)
Supplement: SUPPLEMENTARY TABLE S1 — Taxonomic affiliations of over-expressed ASVs for each comparison (algal part, regions, seasons, and symptoms). [file Table_1.XLSX]

## Sheet: ApexMeristem
Legend: Taxonomic affiliations at genus level of the ASVs characteristic for apex and meristem samples, compared with their occurrence in the entire dataset. P-values are the uncorrected result of a binomial test compared to the entire dataset as a reference. Results are highlighted in green if p < 0.05. The following two tables show the Benjamini and Hochberg correction of the p-values. These ar…
Taxa	APEX				MERISTEM				Entire dataset
	Number of over-expressed ASVs	Total number of over-expressed ASVs	ratio	p-value	Number of over-expressed ASVs	Total number of over-expressed ASVs	ratio	p-value	Number of ASVs	Total number of ASVs	ratio
Algitalea	1	28	0.0357143	0.131842	0	94	0	0.883928	378	16689	0.0226496
Alphaproteobacteria_NA	0	28	0	0.321972	3	94	0.0319149	0.0414705	230	16689	0.0137815
Arenicella	3	28	0.107143	0.0182218	0	94	0	0.969983	611	16689	0.0366109
Dokdonia	1	28	0.0357143	0.117899	0	94	0	0.865956	353	16689	0.0211517
Flavobacteriaceae_NA	0	28	0	0.468951	3	94	0.0319149	0.159587	373	16689	0.0223501
Gammaproteobacteria_NA	0	28	0	0.713667	5	94	0.0531915	0.228395	729	16689	0.0436815
Granulosicoccus	3	28	0.107143	0.0572274	14	94	0.148936	0.000116202	878	16689	0.0526095
KI89A_clade	11	28	0.392857	0	0	94	0	0.431605	100	16689	0.00599197
Litorimonas	3	28	0.107143	0.0113216	13	94	0.138298	1.69026e-06	530	16689	0.0317574
Maribacter	0	28	0	0.139051	15	94	0.159574	0	89	16689	0.00533285
Octadecabacter	0	28	0	0.11551	5	94	0.0531915	4.1024e-06	73	16689	0.00437414
Proteobacteria_NA	0	28	0	0.105018	4	94	0.0425532	3.96295e-05	66	16689	0.0039547
Pseudahrensia	0	28	0	0.140502	1	94	0.0106383	0.091901	90	16689	0.00539277
Rhizobiaceae_NA	1	28	0.0357143	0.0115506	0	94	0	0.421861	97	16689	0.00581221
Rhodobacteraceae_NA	1	28	0.0357143	0.308167	0	94	0	0.978249	666	16689	0.0399065
Rickettsiales_NA	0	28	0	0.0313921	1	94	0.0106383	0.00528472	19	16689	0.00113847
Robiginitomaculum	1	28	0.0357143	0.00877886	0	94	0	0.377692	84	16689	0.00503326
Saprospiraceae_NA	3	28	0.107143	0.314103	15	94	0.159574	0.02665	1691	16689	0.101324
Sva0996_marine_group	0	28	0	0.17602	14	94	0.148936	0	115	16689	0.00689077
Ulvibacter	0	28	0	0.0712527	1	94	0.0106383	0.025885	44	16689	0.00263647
Taxa	APEX
	Number of over-expressed ASVs	Total number of over-expressed ASVs	ratio	p-value	significant after BH correction	rank	n	BH-threshold
KI89A_clade	11	28	0.392857	0	X	1	20	0.0025
Robiginitomaculum	1	28	0.0357143	0.00877886		2	20	0.005
Litorimonas	3	28	0.107143	0.0113216		3	20	0.0075
Rhizobiaceae_NA	1	28	0.0357143	0.0115506		4	20	0.01
Arenicella	3	28	0.107143	0.0182218		5	20	0.0125
Rickettsiales_NA	0	28	0	0.0313921		6	20	0.015
Granulosicoccus	3	28	0.107143	0.0572274		7	20	0.0175
Ulvibacter	0	28	0	0.0712527		8	20	0.02
Proteobacteria_NA	0	28	0	0.105018		9	20	0.0225
Octadecabacter	0	28	0	0.11551		10	20	0.025
Dokdonia	1	28	0.0357143	0.117899		11	20	0.0275
Algitalea	1	28	0.0357143	0.131842		12	20	0.03
Maribacter	0	28	0	0.139051		13	20	0.0325
Pseudahrensia	0	28	0	0.140502		14	20	0.035
Sva0996_marine_group	0	28	0	0.17602		15	20	0.0375
Rhodobacteraceae_NA	1	28	0.0357143	0.308167		16	20	0.04
Saprospiraceae_NA	3	28	0.107143	0.314103		17	20	0.0425
Alphaproteobacteria_NA	0	28	0	0.321972		18	20	0.045
Flavobacteriaceae_NA	0	28	0	0.468951		19	20	0.0475
Gammaproteobacteria_NA	0	28	0	0.713667		20	20	0.05
Taxa	MERISTEM
	Number of over-expressed ASVs	Total number of over-expressed ASVs	ratio	p-value	significant after BH correction	rank	n	BH-threshold
Maribacter	15	94	0.159574	0	X	1	20	0.0025
Sva0996_marine_group	14	94	0.148936	0	X	2	20	0.005
Litorimonas	13	94	0.138298	1.69026e-06	X	3	20	0.0075
Octadecabacter	5	94	0.0531915	4.1024e-06	X	4	20	0.01
Proteobacteria_NA	4	94	0.0425532	3.96295e-05	X	5	20	0.0125
Granulosicoccus	14	94	0.148936	0.000116202	X	6	20	0.015
Rickettsiales_NA	1	94	0.0106383	0.00528472	X	7	20	0.0175
Ulvibacter	1	94	0.0106383	0.025885		8	20	0.02
Saprospiraceae_NA	15	94	0.159574	0.02665		9	20	0.0225
Alphaproteobacteria_NA	3	94	0.0319149	0.0414705		10	20	0.025
Pseudahrensia	1	94	0.0106383	0.091901		11	20	0.0275
Flavobacteriaceae_NA	3	94	0.0319149	0.159587		12	20	0.03
Gammaproteobacteria_NA	5	94	0.0531915	0.228395		13	20	0.0325
Robiginitomaculum	0	94	0	0.377692		14	20	0.035
Rhizobiaceae_NA	0	94	0	0.421861		15	20	0.0375
KI89A_clade	0	94	0	0.431605		16	20	0.04
Dokdonia	0	94	0	0.865956		17	20	0.0425
Algitalea	0	94	0	0.883928		18	20	0.045
Arenicella	0	94	0	0.969983		19	20	0.0475
Rhodobacteraceae_NA	0	94	0	0.978249		20	20	0.05
Taxa	APEX				MERISTEM				Entire dataset
	Number of over-expressed ASVs	Total number of over-expressed ASVs	ratio	p-value	Number of over-expressed ASVs	Total number of over-expressed ASVs	ratio	p-value	Number of ASVs	Total number of ASVs	ratio
Granulosicoccus	3	28	0.107143	0.0572274	14	94	0.148936	0.00012 ***	878	16689	0.0526095
KI89A_clade	11	28	0.392857	<0.00001 ***	0	94	0	0.431605	100	16689	0.00599197
Litorimonas	3	28	0.107143	0.0113216	13	94	0.138298	<0.00001 ***	530	16689	0.0317574
Maribacter	0	28	0	0.139051	15	94	0.159574	<0.00001 ***	89	16689	0.00533285
Octadecabacter	0	28	0	0.11551	5	94	0.0531915	<0.00001 ***	73	16689	0.00437414
Proteobacteria_NA	0	28	0	0.105018	4	94	0.0425532	0.00004 ***	66	16689	0.0039547
Rickettsiales_NA	0	28	0	0.0313921	1	94	0.0106383	0.0053 ***	19	16689	0.00113847
Sva0996_marine_group	0	28	0	0.17602	14	94	0.148936	<0.00001 ***	115	16689	0.00689077

## Sheet: Region
Legend: Taxonomic affiliations at genus level of the ASVs characteristic for the Roscoff, Helgoland, or Skagerrak samples, compared with their occurrence in the entire dataset. P-values are the uncorrected result of a binomial test compared to the entire dataset as a reference. Results are highlighted in green if p < 0.05. The following three tables show the Benjamini and Hochberg correction of t…
Taxa	Roscoff				Helgoland				Skagerrak				Entire dataset
	Number of over-expressed ASVs	Total number of over-expressed ASVs	ratio	p-value	Number of over-expressed ASVs	Total number of over-expressed ASVs	ratio	p-value	Number of over-expressed ASVs	Total number of over-expressed ASVs	ratio	p-value	Number of ASVs	Total number of ASVs	ratio
Achromobacter	0	234	0	0.201042	1	243	0.00411523	0.0232008	0	18	0	0.017117	16	16689	0.000958715
Algimonas	4	234	0.017094	1.73487e-05	0	243	0	0.274244	0	18	0	0.0234642	22	16689	0.00131823
Algitalea	8	234	0.034188	0.0870616	17	243	0.0699588	1.38984e-05	0	18	0	0.337928	378	16689	0.0226496
Alphaproteobacteria_NA	3	234	0.0128205	0.403359	0	243	0	0.965686	0	18	0	0.221038	230	16689	0.0137815
Alteromonadaceae_NA	0	234	0	0.701487	1	243	0.00411523	0.356386	0	18	0	0.0888024	86	16689	0.00515309
Arenicella	5	234	0.0213675	0.860205	17	243	0.0699588	0.00399415	3	18	0.166667	0.00363884	611	16689	0.0366109
Bacteriovoracaceae_NA	0	234	0	0.413401	1	243	0.00411523	0.106614	0	18	0	0.0402014	38	16689	0.00227695
Blastopirellula	2	234	0.00854701	0.687403	14	243	0.0576132	5.74296e-06	0	18	0	0.239568	252	16689	0.0150998
Cellvibrionaceae_NA	1	234	0.0042735	0.851132	0	243	0	0.970397	0	18	0	0.229513	240	16689	0.0143807
Cytophagales_NA	1	234	0.0042735	0.132028	0	243	0	0.481133	0	18	0	0.0474384	45	16689	0.00269639
Dokdonia	4	234	0.017094	0.5524	5	243	0.0205761	0.40882	0	18	0	0.319423	353	16689	0.0211517
Erythrobacter	1	234	0.0042735	0.20601	1	243	0.00411523	0.2178	0	18	0	0.0627731	60	16689	0.00359518
Escherichia/Shigella	1	234	0.0042735	0.0296849	0	243	0	0.241799	0	18	0	0.0202954	19	16689	0.00113847
Flavobacteriaceae_NA	2	234	0.00854701	0.896077	0	243	0	0.995883	0	18	0	0.334266	373	16689	0.0223501
Gammaproteobacteria_NA	17	234	0.0726496	0.0151625	17	243	0.0699588	0.0213308	0	18	0	0.552445	729	16689	0.0436815
Granulosicoccus	23	234	0.0982906	0.0014985	17	243	0.0699588	0.0922235	0	18	0	0.621973	878	16689	0.0526095
Hellea	3	234	0.0128205	0.211365	0	243	0	0.914442	0	18	0	0.166495	168	16689	0.0100665
Hyphomonadaceae_NA	11	234	0.0470085	0.00640359	0	243	0	0.995631	0	18	0	0.331322	369	16689	0.0221104
KI89A_clade	19	234	0.0811966	0	0	243	0	0.767863	2	18	0.111111	0.000164104	100	16689	0.00599197
Leucothrix	0	234	0	0.713847	1	243	0.00411523	0.371998	0	18	0	0.0917615	89	16689	0.00533285
Lewinella	0	234	0	0.846229	7	243	0.0288066	0.000837353	0	18	0	0.134132	133	16689	0.00796932
Litoreibacter	1	234	0.0042735	0.0872487	0	243	0	0.399596	0	18	0	0.037084	35	16689	0.00209719
Litorimonas	23	234	0.0982906	5.97833e-07	46	243	0.1893	0	0	18	0	0.44061	530	16689	0.0317574
Maribacter	14	234	0.0598291	4.48197e-12	0	243	0	0.727291	0	18	0	0.0917615	89	16689	0.00533285
Marinicella	1	234	0.0042735	0.221345	0	243	0	0.601101	0	18	0	0.065812	63	16689	0.00377494
Micavibrionales_NA	1	234	0.0042735	0.660646	2	243	0.00823045	0.416096	0	18	0	0.160115	161	16689	0.00964707
Octadecabacter	12	234	0.0512821	6.3098e-11	0	243	0	0.655357	0	18	0	0.0758743	73	16689	0.00437414
Paraglaciecola	1	234	0.0042735	0.0914888	3	243	0.0123457	0.00203815	0	18	0	0.0381242	36	16689	0.00215711
Portibacter	1	234	0.0042735	0.824769	5	243	0.0205761	0.112873	0	18	0	0.216767	225	16689	0.0134819
Proteobacteria_NA	4	234	0.017094	0.00256574	0	243	0	0.618215	0	18	0	0.0688415	66	16689	0.0039547
Pseudahrensia	0	234	0	0.717852	2	243	0.00823045	0.144866	0	18	0	0.0927458	90	16689	0.00539277
Reichenbachiella	19	234	0.0811966	1.11199e-09	0	243	0	0.977313	0	18	0	0.244549	258	16689	0.0154593
Rhizobiaceae_NA	0	234	0	0.74437	0	243	0	0.757436	9	18	0.5	0	97	16689	0.00581221
Rhodobacteraceae_NA	1	234	0.0042735	0.999221	19	243	0.0781893	0.00197402	1	18	0.0555556	0.160099	666	16689	0.0399065
Rickettsiales_NA	1	234	0.0042735	0.0296849	0	243	0	0.241799	0	18	0	0.0202954	19	16689	0.00113847
Robiginitomaculum	2	234	0.00854701	0.115286	4	243	0.0164609	0.00817139	0	18	0	0.0868247	84	16689	0.00503326
Rubidimonas	2	234	0.00854701	0.370331	4	243	0.0164609	0.0778686	1	18	0.0555556	0.0119561	155	16689	0.00928755
Saprospiraceae_NA	16	234	0.0683761	0.946539	34	243	0.139918	0.0217182	1	18	0.0555556	0.557186	1691	16689	0.101324
Sphingorhabdus	1	234	0.0042735	0.151153	0	243	0	0.51057	0	18	0	0.0515507	49	16689	0.00293607
Sporolactobacillus	1	234	0.0042735	0.122692	3	243	0.0123457	0.00383438	0	18	0	0.045376	43	16689	0.00257655
Stenotrophomonas	1	234	0.0042735	0.0521824	1	243	0.00411523	0.055775	0	18	0	0.0276741	26	16689	0.00155791
Sulfitobacter	2	234	0.00854701	0.140129	1	243	0.00411523	0.387458	0	18	0	0.0947114	92	16689	0.00551261
Sva0996_marine_group	2	234	0.00854701	0.219512	5	243	0.0205761	0.00722628	0	18	0	0.117029	115	16689	0.00689077
Tateyamaria	7	234	0.0299145	6.05738e-07	0	243	0	0.51057	0	18	0	0.0515507	49	16689	0.00293607
Tenacibaculum	6	234	0.025641	0.0865989	9	243	0.037037	0.00660526	0	18	0	0.253601	269	16689	0.0161184
Thalassotalea	0	234	0	0.717852	6	243	0.0246914	0.000399422	0	18	0	0.0927458	90	16689	0.00539277
Yoonia-Loktanella	10	234	0.042735	9.46249e-08	0	243	0	0.73516	0	18	0	0.0937291	91	16689	0.00545269
Zobellia	0	234	0	0.557204	0	243	0	0.570863	1	18	0.0555556	0.00178075	58	16689	0.00347534
Taxa	Roscoff
	Number of over-expressed ASVs	Total number of over-expressed ASVs	ratio	p-value	significant after BH correction	rank	n	BH-threshold
KI89A_clade	19	234	0.0811966	0	X	1	48	0.00104167
Maribacter	14	234	0.0598291	4.48197e-12	X	2	48	0.00208333
Octadecabacter	12	234	0.0512821	6.3098e-11	X	3	48	0.003125
Reichenbachiella	19	234	0.0811966	1.11199e-09	X	4	48	0.00416667
Yoonia-Loktanella	10	234	0.042735	9.46249e-08	X	5	48	0.00520833
Litorimonas	23	234	0.0982906	5.97833e-07	X	6	48	0.00625
Tateyamaria	7	234	0.0299145	6.05738e-07	X	7	48	0.00729167
Algimonas	4	234	0.017094	1.73487e-05	X	8	48	0.00833333
Granulosicoccus	23	234	0.0982906	0.0014985	X	9	48	0.009375
Proteobacteria_NA	4	234	0.017094	0.00256574	X	10	48	0.0104167
Hyphomonadaceae_NA	11	234	0.0470085	0.00640359	X	11	48	0.0114583
Gammaproteobacteria_NA	17	234	0.0726496	0.0151625		12	48	0.0125
Escherichia/Shigella	1	234	0.0042735	0.0296849		13	48	0.0135417
Rickettsiales_NA	1	234	0.0042735	0.0296849		14	48	0.0145833
Stenotrophomonas	1	234	0.0042735	0.0521824		15	48	0.015625
Tenacibaculum	6	234	0.025641	0.0865989		16	48	0.0166667
Algitalea	8	234	0.034188	0.0870616		17	48	0.0177083
Litoreibacter	1	234	0.0042735	0.0872487		18	48	0.01875
Paraglaciecola	1	234	0.0042735	0.0914888		19	48	0.0197917
Robiginitomaculum	2	234	0.00854701	0.115286		20	48	0.0208333
Sporolactobacillus	1	234	0.0042735	0.122692		21	48	0.021875
Cytophagales_NA	1	234	0.0042735	0.132028		22	48	0.0229167
Sulfitobacter	2	234	0.00854701	0.140129		23	48	0.0239583
Sphingorhabdus	1	234	0.0042735	0.151153		24	48	0.025
Achromobacter	0	234	0	0.201042		25	48	0.0260417
Erythrobacter	1	234	0.0042735	0.20601		26	48	0.0270833
Hellea	3	234	0.0128205	0.211365		27	48	0.028125
Sva0996_marine_group	2	234	0.00854701	0.219512		28	48	0.0291667
Marinicella	1	234	0.0042735	0.221345		29	48	0.0302083
Rubidimonas	2	234	0.00854701	0.370331		30	48	0.03125
Alphaproteobacteria_NA	3	234	0.0128205	0.403359		31	48	0.0322917
Bacteriovoracaceae_NA	0	234	0	0.413401		32	48	0.0333333
Dokdonia	4	234	0.017094	0.5524		33	48	0.034375
Zobellia	0	234	0	0.557204		34	48	0.0354167
Micavibrionales_NA	1	234	0.0042735	0.660646		35	48	0.0364583
Blastopirellula	2	234	0.00854701	0.687403		36	48	0.0375
Alteromonadaceae_NA	0	234	0	0.701487		37	48	0.0385417
Leucothrix	0	234	0	0.713847		38	48	0.0395833
Pseudahrensia	0	234	0	0.717852		39	48	0.040625
Thalassotalea	0	234	0	0.717852		40	48	0.0416667
Rhizobiaceae_NA	0	234	0	0.74437		41	48	0.0427083
Portibacter	1	234	0.0042735	0.824769		42	48	0.04375
Lewinella	0	234	0	0.846229		43	48	0.0447917
Cellvibrionaceae_NA	1	234	0.0042735	0.851132		44	48	0.0458333
Arenicella	5	234	0.0213675	0.860205		45	48	0.046875
Flavobacteriaceae_NA	2	234	0.00854701	0.896077		46	48	0.0479167
Saprospiraceae_NA	16	234	0.0683761	0.946539		47	48	0.0489583
Rhodobacteraceae_NA	1	234	0.0042735	0.999221		48	48	0.05
Taxa	Helgoland
	Number of over-expressed ASVs	Total number of over-expressed ASVs	ratio	p-value	significant after BH correction	rank	n	BH-threshold
Litorimonas	46	243	0.1893	0	X	1	48	0.00104167
Blastopirellula	14	243	0.0576132	5.74296e-06	X	2	48	0.00208333
Algitalea	17	243	0.0699588	1.38984e-05	X	3	48	0.003125
Thalassotalea	6	243	0.0246914	0.000399422	X	4	48	0.00416667
Lewinella	7	243	0.0288066	0.000837353	X	5	48	0.00520833
Rhodobacteraceae_NA	19	243	0.0781893	0.00197402	X	6	48	0.00625
Paraglaciecola	3	243	0.0123457	0.00203815	X	7	48	0.00729167
Sporolactobacillus	3	243	0.0123457	0.00383438	X	8	48	0.00833333
Arenicella	17	243	0.0699588	0.00399415	X	9	48	0.009375
Tenacibaculum	9	243	0.037037	0.00660526	X	10	48	0.0104167
Sva0996_marine_group	5	243	0.0205761	0.00722628	X	11	48	0.0114583
Robiginitomaculum	4	243	0.0164609	0.00817139	X	12	48	0.0125
Gammaproteobacteria_NA	17	243	0.0699588	0.0213308		13	48	0.0135417
Saprospiraceae_NA	34	243	0.139918	0.0217182		14	48	0.0145833
Achromobacter	1	243	0.00411523	0.0232008		15	48	0.015625
Stenotrophomonas	1	243	0.00411523	0.055775		16	48	0.0166667
Rubidimonas	4	243	0.0164609	0.0778686		17	48	0.0177083
Granulosicoccus	17	243	0.0699588	0.0922235		18	48	0.01875
Bacteriovoracaceae_NA	1	243	0.00411523	0.106614		19	48	0.0197917
Portibacter	5	243	0.0205761	0.112873		20	48	0.0208333
Pseudahrensia	2	243	0.00823045	0.144866		21	48	0.021875
Erythrobacter	1	243	0.00411523	0.2178		22	48	0.0229167
Escherichia/Shigella	0	243	0	0.241799		23	48	0.0239583
Rickettsiales_NA	0	243	0	0.241799		24	48	0.025
Algimonas	0	243	0	0.274244		25	48	0.0260417
Alteromonadaceae_NA	1	243	0.00411523	0.356386		26	48	0.0270833
Leucothrix	1	243	0.00411523	0.371998		27	48	0.028125
Sulfitobacter	1	243	0.00411523	0.387458		28	48	0.0291667
Litoreibacter	0	243	0	0.399596		29	48	0.0302083
Dokdonia	5	243	0.0205761	0.40882		30	48	0.03125
Micavibrionales_NA	2	243	0.00823045	0.416096		31	48	0.0322917
Cytophagales_NA	0	243	0	0.481133		32	48	0.0333333
Sphingorhabdus	0	243	0	0.51057		33	48	0.034375
Tateyamaria	0	243	0	0.51057		34	48	0.0354167
Zobellia	0	243	0	0.570863		35	48	0.0364583
Marinicella	0	243	0	0.601101		36	48	0.0375
Proteobacteria_NA	0	243	0	0.618215		37	48	0.0385417
Octadecabacter	0	243	0	0.655357		38	48	0.0395833
Maribacter	0	243	0	0.727291		39	48	0.040625
Yoonia-Loktanella	0	243	0	0.73516		40	48	0.0416667
Rhizobiaceae_NA	0	243	0	0.757436		41	48	0.0427083
KI89A_clade	0	243	0	0.767863		42	48	0.04375
Hellea	0	243	0	0.914442		43	48	0.0447917
Alphaproteobacteria_NA	0	243	0	0.965686		44	48	0.0458333
Cellvibrionaceae_NA	0	243	0	0.970397		45	48	0.046875
Reichenbachiella	0	243	0	0.977313		46	48	0.0479167
Hyphomonadaceae_NA	0	243	0	0.995631		47	48	0.0489583
Flavobacteriaceae_NA	0	243	0	0.995883		48	48	0.05
Taxa	Skagerrak
	Number of over-expressed ASVs	Total number of over-expressed ASVs	ratio	p-value	significant after BH correction	rank	n	BH-threshold
Rhizobiaceae_NA	9	18	0.5	0	X	1	48	0.00104167
KI89A_clade	2	18	0.111111	0.000164104	X	2	48	0.00208333
Zobellia	1	18	0.0555556	0.00178075	X	3	48	0.003125
Arenicella	3	18	0.166667	0.00363884	X	4	48	0.00416667
Rubidimonas	1	18	0.0555556	0.0119561		5	48	0.00520833
Achromobacter	0	18	0	0.017117		6	48	0.00625
Escherichia/Shigella	0	18	0	0.0202954		7	48	0.00729167
Rickettsiales_NA	0	18	0	0.0202954		8	48	0.00833333
Algimonas	0	18	0	0.0234642		9	48	0.009375
Stenotrophomonas	0	18	0	0.0276741		10	48	0.0104167
Litoreibacter	0	18	0	0.037084		11	48	0.0114583
Paraglaciecola	0	18	0	0.0381242		12	48	0.0125
Bacteriovoracaceae_NA	0	18	0	0.0402014		13	48	0.0135417
Sporolactobacillus	0	18	0	0.045376		14	48	0.0145833
Cytophagales_NA	0	18	0	0.0474384		15	48	0.015625
Sphingorhabdus	0	18	0	0.0515507		16	48	0.0166667
Tateyamaria	0	18	0	0.0515507		17	48	0.0177083
Erythrobacter	0	18	0	0.0627731		18	48	0.01875
Marinicella	0	18	0	0.065812		19	48	0.0197917
Proteobacteria_NA	0	18	0	0.0688415		20	48	0.0208333
Octadecabacter	0	18	0	0.0758743		21	48	0.021875
Robiginitomaculum	0	18	0	0.0868247		22	48	0.0229167
Alteromonadaceae_NA	0	18	0	0.0888024		23	48	0.0239583
Leucothrix	0	18	0	0.0917615		24	48	0.025
Maribacter	0	18	0	0.0917615		25	48	0.0260417
Pseudahrensia	0	18	0	0.0927458		26	48	0.0270833
Thalassotalea	0	18	0	0.0927458		27	48	0.028125
Yoonia-Loktanella	0	18	0	0.0937291		28	48	0.0291667
Sulfitobacter	0	18	0	0.0947114		29	48	0.0302083
Sva0996_marine_group	0	18	0	0.117029		30	48	0.03125
Lewinella	0	18	0	0.134132		31	48	0.0322917
Rhodobacteraceae_NA	1	18	0.0555556	0.160099		32	48	0.0333333
Micavibrionales_NA	0	18	0	0.160115		33	48	0.034375
Hellea	0	18	0	0.166495		34	48	0.0354167
Portibacter	0	18	0	0.216767		35	48	0.0364583
Alphaproteobacteria_NA	0	18	0	0.221038		36	48	0.0375
Cellvibrionaceae_NA	0	18	0	0.229513		37	48	0.0385417
Blastopirellula	0	18	0	0.239568		38	48	0.0395833
Reichenbachiella	0	18	0	0.244549		39	48	0.040625
Tenacibaculum	0	18	0	0.253601		40	48	0.0416667
Dokdonia	0	18	0	0.319423		41	48	0.0427083
Hyphomonadaceae_NA	0	18	0	0.331322		42	48	0.04375
Flavobacteriaceae_NA	0	18	0	0.334266		43	48	0.0447917
Algitalea	0	18	0	0.337928		44	48	0.0458333
Litorimonas	0	18	0	0.44061		45	48	0.046875
Gammaproteobacteria_NA	0	18	0	0.552445		46	48	0.0479167
Saprospiraceae_NA	1	18	0.0555556	0.557186		47	48	0.0489583
Granulosicoccus	0	18	0	0.621973		48	48	0.05
Taxa	Roscoff				Helgoland				Skagerrak				Entire dataset
	Number of over-expressed ASVs	Total number of over-expressed ASVs	ratio	p-value	Number of over-expressed ASVs	Total number of over-expressed ASVs	ratio	p-value	Number of over-expressed ASVs	Total number of over-expressed ASVs	ratio	p-value	Number of ASVs	Total number of ASVs	ratio
Algimonas	4	234	0.017094	0.00002 ***	0	243	0	0.274244	0	18	0	0.02346	22	16689	0.00131823
Algitalea	8	234	0.034188	0.0870616	17	243	0.0699588	0.00001 ***	0	18	0	0.337928	378	16689	0.0226496
Arenicella	5	234	0.0213675	0.860205	17	243	0.0699588	0.00399 **	3	18	0.166667	0.00364 **	611	16689	0.0366109
Blastopirellula	2	234	0.00854701	0.687403	14	243	0.0576132	0.00001 ***	0	18	0	0.239568	252	16689	0.0150998
Granulosicoccus	23	234	0.0982906	0.00150**	17	243	0.0699588	0.0922235	0	18	0	0.621973	878	16689	0.0526095
Hyphomonadaceae_NA	11	234	0.0470085	0.0064 **	0	243	0	0.995631	0	18	0	0.331322	369	16689	0.0221104
KI89A_clade	19	234	0.0811966	<0.00001 ***	0	243	0	0.767863	2	18	0.111111	0.00016 ***	100	16689	0.00599197
Lewinella	0	234	0	0.846229	7	243	0.0288066	0.00084 ***	0	18	0	0.134132	133	16689	0.00796932
Litorimonas	23	234	0.0982906	<0.00001 ***	46	243	0.1893	<0.00001 ***	0	18	0	0.44061	530	16689	0.0317574
Maribacter	14	234	0.0598291	<0.00001 ***	0	243	0	0.727291	0	18	0	0.0917615	89	16689	0.00533285
Octadecabacter	12	234	0.0512821	<0.00001 ***	0	243	0	0.655357	0	18	0	0.0758743	73	16689	0.00437414
Paraglaciecola	1	234	0.0042735	0.0914888	3	243	0.0123457	0.00204 **	0	18	0	0.0812	36	16689	0.00215711
Proteobacteria_NA	4	234	0.017094	0.00257 **	0	243	0	0.618215	0	18	0	0.0688415	66	16689	0.0039547
Reichenbachiella	19	234	0.0811966	<0.00001 ***	0	243	0	0.977313	0	18	0	0.244549	258	16689	0.0154593
Rhizobiaceae_NA	0	234	0	0.74437	0	243	0	0.757436	9	18	0.5	<0.00001 ***	97	16689	0.00581221
Rhodobacteraceae_NA	1	234	0.0042735	0.999221	19	243	0.0781893	0.00197 **	1	18	0.0555556	0.160099	666	16689	0.0399065
Robiginitomaculum	2	234	0.00854701	0.115286	4	243	0.0164609	0.00817 **	0	18	0	0.0868247	84	16689	0.00503326
Sporolactobacillus	1	234	0.0042735	0.122692	3	243	0.0123457	0.00382 **	0	18	0	0.04538	43	16689	0.00257655
Sva0996_marine_group	2	234	0.00854701	0.219512	5	243	0.0205761	0.00723 **	0	18	0	0.117029	115	16689	0.00689077
Tateyamaria	7	234	0.0299145	<0.00001 ***	0	243	0	0.51057	0	18	0	0.0515507	49	16689	0.00293607
Tenacibaculum	6	234	0.025641	0.0865989	9	243	0.037037	0.00661 **	0	18	0	0.253601	269	16689	0.0161184
Thalassotalea	0	234	0	0.717852	6	243	0.0246914	0.00040 ***	0	18	0	0.0927458	90	16689	0.00539277
Yoonia-Loktanella	10	234	0.042735	<0.00001 ***	0	243	0	0.73516	0	18	0	0.0937291	91	16689	0.00545269
Zobellia	0	234	0	0.557204	0	243	0	0.570863	1	18	0.0555556	0.00178 **	58	16689	0.00347534

## Sheet: Season
Legend: Taxonomic affiliations at genus level of the ASVs characteristic for each season from Roscoff samples. The first table shows the taxonomic affiliation of all the ASVs. P-values are the uncorrected result of a binomial test compared to the entire dataset as a reference. Results are highlighted in green if p < 0.05. The following four tables show the Benjamini and Hochberg correction of the…
Taxa	Winter				Spring				Summer				Autumn				Entire dataset
	Number of over-expressed ASVs	Total number of over-expressed ASVs	ratio	p-value	Number of over-expressed ASVs	Total number of over-expressed ASVs	ratio	p-value	Number of over-expressed ASVs	Total number of over-expressed ASVs	ratio	p-value	Number of over-expressed ASVs	Total number of over-expressed ASVs	ratio	p-value	Number of ASVs	Total number of ASVs	ratio
Acinetobacter	1	126	0.00793651	0.0112442	0	85	0	0.101496	0	95	0	0.112738	0	115	0	0.134802	21	16689	0.00125831
Algimonas	0	126	0	0.153129	0	85	0	0.106066	2	95	0.0210526	0.000289573	2	115	0.0173913	0.00050649	22	16689	0.00131823
Algitalea	4	126	0.031746	0.158698	0	85	0	0.85735	0	95	0	0.886557	15	115	0.130435	8.58573e-09	378	16689	0.0226496
Arenicella	8	126	0.0634921	0.0425644	4	85	0.0470588	0.200953	14	95	0.147368	1.95482e-06	5	115	0.0434783	0.246081	611	16689	0.0366109
Bacteriovoracaceae_NA	1	126	0.00793651	0.0338936	0	85	0	0.176145	0	95	0	0.194713	0	115	0	0.230603	38	16689	0.00227695
Blastopirellula	2	126	0.015873	0.296767	3	85	0.0352941	0.0401896	2	95	0.0210526	0.17383	3	115	0.026087	0.0972364	252	16689	0.0150998
Cellvibrionaceae_NA	3	126	0.0238095	0.109239	1	85	0.0117647	0.346016	0	95	0	0.747435	1	115	0.00869565	0.493764	240	16689	0.0143807
Cocleimonas	0	126	0	0.293742	0	85	0	0.20912	0	95	0	0.230651	1	115	0.00869565	0.0405646	46	16689	0.00275631
Colwellia	0	126	0	0.501679	1	85	0.0117647	0.0803947	0	95	0	0.408532	0	115	0	0.470438	92	16689	0.00551261
Cytophagales_NA	0	126	0	0.288375	0	85	0	0.205071	0	95	0	0.226247	2	115	0.0173913	0.00386511	45	16689	0.00269639
Dokdonia	2	126	0.015873	0.499547	1	85	0.0117647	0.539076	9	95	0.0947368	3.52044e-05	2	115	0.0173913	0.439942	353	16689	0.0211517
Erythrobacter	0	126	0	0.364796	0	85	0	0.263717	0	95	0	0.289764	1	115	0.00869565	0.0649034	60	16689	0.00359518
Escherichia/Shigella	2	126	0.015873	0.000432563	2	85	0.0235294	0.000135908	0	95	0	0.102567	0	115	0	0.122781	19	16689	0.00113847
Flavobacteriaceae_NA	3	126	0.0238095	0.311172	7	85	0.0823529	0.000649585	0	95	0	0.883206	1	115	0.00869565	0.730302	373	16689	0.0223501
Gammaproteobacteria_NA	20	126	0.15873	1.40426e-07	5	85	0.0588235	0.167575	3	95	0.0315789	0.600055	2	115	0.0173913	0.88284	729	16689	0.0436815
Granulosicoccus	14	126	0.111111	0.00265915	2	85	0.0235294	0.830787	12	95	0.126316	0.00143241	4	115	0.0347826	0.728881	878	16689	0.0526095
Hellea	0	126	0	0.720515	0	85	0	0.576833	1	95	0.0105263	0.248092	1	115	0.00869565	0.322303	168	16689	0.0100665
Hyphomonadaceae_NA	5	126	0.0396825	0.0617529	0	85	0	0.850502	8	95	0.0842105	0.000267845	6	115	0.0521739	0.0142884	369	16689	0.0221104
KI89A_clade	0	126	0	0.53105	0	85	0	0.400014	5	95	0.0526316	2.54938e-05	0	115	0	0.499	100	16689	0.00599197
Lewinella	0	126	0	0.635109	0	85	0	0.493437	1	95	0.0105263	0.175523	1	115	0.00869565	0.233425	133	16689	0.00796932
Litoreibacter	2	126	0.015873	0.00247699	1	85	0.0117647	0.0139919	0	95	0	0.180812	0	115	0	0.214496	35	16689	0.00209719
Litorimonas	4	126	0.031746	0.371432	15	85	0.176471	1.04634e-08	7	95	0.0736842	0.0108946	26	115	0.226087	0	530	16689	0.0317574
Marinicella	2	126	0.015873	0.0124058	0	85	0	0.274923	0	95	0	0.301834	0	115	0	0.352696	63	16689	0.00377494
Micavibrionales_NA	1	126	0.00793651	0.343354	2	85	0.0235294	0.0494922	0	95	0	0.601848	1	115	0.00869565	0.304608	161	16689	0.00964707
Nonlabens	0	126	0	0.364796	1	85	0.0117647	0.0379045	0	95	0	0.289764	0	115	0	0.339125	60	16689	0.00359518
Octadecabacter	17	126	0.134921	0	1	85	0.0117647	0.0538009	0	95	0	0.34062	3	115	0.026087	0.00172057	73	16689	0.00437414
Paraglaciecola	0	126	0	0.238214	2	85	0.0235294	0.000868631	0	95	0	0.185472	0	115	0	0.219902	36	16689	0.00215711
Parvularculaceae_NA	1	126	0.00793651	0.0219613	0	85	0	0.141813	0	95	0	0.157115	0	115	0	0.186906	30	16689	0.00179759
Peredibacter	0	126	0	0.776015	2	85	0.0235294	0.0798222	0	95	0	0.676342	0	115	0	0.744761	197	16689	0.0118042
Planctomycetales_NA	0	126	0	0.146703	0	85	0	0.101496	1	95	0.0105263	0.00654136	0	115	0	0.134802	21	16689	0.00125831
Polaribacter	1	126	0.00793651	0.0695946	0	85	0	0.252341	1	95	0.0105263	0.0422539	0	115	0	0.325272	57	16689	0.00341542
Portibacter	1	126	0.00793651	0.507832	5	85	0.0588235	0.00105826	0	95	0	0.72459	0	115	0	0.790067	225	16689	0.0134819
Pseudahrensia	1	126	0.00793651	0.148408	0	85	0	0.36848	2	95	0.0210526	0.0150225	1	115	0.00869565	0.128242	90	16689	0.00539277
Reichenbachiella	10	126	0.0793651	4.79223e-06	0	85	0	0.734011	0	95	0	0.772386	0	115	0	0.833324	258	16689	0.0154593
Rhizobiaceae_NA	1	126	0.00793651	0.166844	0	85	0	0.390721	2	95	0.0210526	0.018283	0	115	0	0.488473	97	16689	0.00581221
Rhodobacteraceae_NA	3	126	0.0238095	0.744636	3	85	0.0352941	0.441642	2	95	0.0210526	0.735569	4	115	0.0347826	0.487	666	16689	0.0399065
Robiginitomaculum	1	126	0.00793651	0.132971	3	85	0.0352941	0.000939338	0	95	0	0.380825	1	115	0.00869565	0.114633	84	16689	0.00503326
Rubidimonas	0	126	0	0.691397	0	85	0	0.547574	3	95	0.0315789	0.0121376	1	115	0.00869565	0.289378	155	16689	0.00928755
Saprospiraceae_NA	6	126	0.047619	0.976098	9	85	0.105882	0.358782	5	95	0.0526316	0.928155	12	115	0.104348	0.382053	1691	16689	0.101324
Sphingorhabdus	0	126	0	0.309603	0	85	0	0.221147	1	95	0.0105263	0.0321456	1	115	0.00869565	0.0454246	49	16689	0.00293607
Sporolactobacillus	0	126	0	0.277519	0	85	0	0.196911	0	95	0	0.217364	1	115	0.00869565	0.0359178	43	16689	0.00257655
Stenotrophomonas	0	126	0	0.178358	0	85	0	0.12412	0	95	0	0.13767	1	115	0.00869565	0.0141591	26	16689	0.00155791
Sulfitobacter	1	126	0.00793651	0.153632	2	85	0.0235294	0.0118264	0	95	0	0.408532	2	115	0.0173913	0.0261992	92	16689	0.00551261
Sva0996_marine_group	0	126	0	0.581568	0	85	0	0.44442	12	95	0.126316	1.62981e-13	0	115	0	0.5485	115	16689	0.00689077
Tateyamaria	1	126	0.00793651	0.0534424	1	85	0.0117647	0.0261994	1	95	0.0105263	0.0321456	8	115	0.0695652	8.61676e-11	49	16689	0.00293607
Tenacibaculum	0	126	0	0.870938	5	85	0.0588235	0.00259001	1	95	0.0105263	0.454007	1	115	0.00869565	0.554939	269	16689	0.0161184
Terrilactibacillus	1	126	0.00793651	0.0122803	0	85	0	0.106066	0	95	0	0.117781	0	115	0	0.140751	22	16689	0.00131823
Thalassotalea	1	126	0.00793651	0.148408	0	85	0	0.36848	0	95	0	0.401722	0	115	0	0.463048	90	16689	0.00539277
Ulvibacter	1	126	0.00793651	0.0441428	1	85	0.0117647	0.0214723	0	95	0	0.221818	0	115	0	0.26184	44	16689	0.00263647
Vibrio	0	126	0	0.309603	0	85	0	0.221147	0	95	0	0.243715	1	115	0.00869565	0.0454246	49	16689	0.00293607
Winogradskyella	0	126	0	0.37435	1	85	0.0117647	0.0402123	0	95	0	0.297833	0	115	0	0.348204	62	16689	0.00371502
Yoonia-Loktanella	5	126	0.0396825	7.40315e-05	5	85	0.0588235	7.95059e-06	0	95	0	0.405136	4	115	0.0347826	0.000449914	91	16689	0.00545269
Taxa	Winter
	Number of over-expressed ASVs	Total number of over-expressed ASVs	ratio	p-value	significant after BH correction	rank	n	BH-threshold
Octadecabacter	17	126	0.134921	0	X	1	52	0.000961538
Gammaproteobacteria_NA	20	126	0.15873	1.40426e-07	X	2	52	0.00192308
Reichenbachiella	10	126	0.0793651	4.79223e-06	X	3	52	0.00288462
Yoonia-Loktanella	5	126	0.0396825	7.40315e-05	X	4	52	0.00384615
Escherichia/Shigella	2	126	0.015873	0.000432563	X	5	52	0.00480769
Litoreibacter	2	126	0.015873	0.00247699	X	6	52	0.00576923
Granulosicoccus	14	126	0.111111	0.00265915	X	7	52	0.00673077
Acinetobacter	1	126	0.00793651	0.0112442		8	52	0.00769231
Terrilactibacillus	1	126	0.00793651	0.0122803		9	52	0.00865385
Marinicella	2	126	0.015873	0.0124058		10	52	0.00961538
Parvularculaceae_NA	1	126	0.00793651	0.0219613		11	52	0.0105769
Bacteriovoracaceae_NA	1	126	0.00793651	0.0338936		12	52	0.0115385
Arenicella	8	126	0.0634921	0.0425644		13	52	0.0125
Ulvibacter	1	126	0.00793651	0.0441428		14	52	0.0134615
Tateyamaria	1	126	0.00793651	0.0534424		15	52	0.0144231
Hyphomonadaceae_NA	5	126	0.0396825	0.0617529		16	52	0.0153846
Polaribacter	1	126	0.00793651	0.0695946		17	52	0.0163462
Cellvibrionaceae_NA	3	126	0.0238095	0.109239		18	52	0.0173077
Robiginitomaculum	1	126	0.00793651	0.132971		19	52	0.0182692
Planctomycetales_NA	0	126	0	0.146703		20	52	0.0192308
Pseudahrensia	1	126	0.00793651	0.148408		21	52	0.0201923
Thalassotalea	1	126	0.00793651	0.148408		22	52	0.0211538
Algimonas	0	126	0	0.153129		23	52	0.0221154
Sulfitobacter	1	126	0.00793651	0.153632		24	52	0.0230769
Algitalea	4	126	0.031746	0.158698		25	52	0.0240385
Rhizobiaceae_NA	1	126	0.00793651	0.166844		26	52	0.025
Stenotrophomonas	0	126	0	0.178358		27	52	0.0259615
Paraglaciecola	0	126	0	0.238214		28	52	0.0269231
Sporolactobacillus	0	126	0	0.277519		29	52	0.0278846
Cytophagales_NA	0	126	0	0.288375		30	52	0.0288462
Cocleimonas	0	126	0	0.293742		31	52	0.0298077
Blastopirellula	2	126	0.015873	0.296767		32	52	0.0307692
Sphingorhabdus	0	126	0	0.309603		33	52	0.0317308
Vibrio	0	126	0	0.309603		34	52	0.0326923
Flavobacteriaceae_NA	3	126	0.0238095	0.311172		35	52	0.0336538
Micavibrionales_NA	1	126	0.00793651	0.343354		36	52	0.0346154
Erythrobacter	0	126	0	0.364796		37	52	0.0355769
Nonlabens	0	126	0	0.364796		38	52	0.0365385
Litorimonas	4	126	0.031746	0.371432		39	52	0.0375
Winogradskyella	0	126	0	0.37435		40	52	0.0384615
Dokdonia	2	126	0.015873	0.499547		41	52	0.0394231
Colwellia	0	126	0	0.501679		42	52	0.0403846
Portibacter	1	126	0.00793651	0.507832		43	52	0.0413462
KI89A_clade	0	126	0	0.53105		44	52	0.0423077
Sva0996_marine_group	0	126	0	0.581568		45	52	0.0432692
Lewinella	0	126	0	0.635109		46	52	0.0442308
Rubidimonas	0	126	0	0.691397		47	52	0.0451923
Hellea	0	126	0	0.720515		48	52	0.0461538
Rhodobacteraceae_NA	3	126	0.0238095	0.744636		49	52	0.0471154
Peredibacter	0	126	0	0.776015		50	52	0.0480769
Tenacibaculum	0	126	0	0.870938		51	52	0.0490385
Saprospiraceae_NA	6	126	0.047619	0.976098		52	52	0.05
Taxa	Spring
	Number of over-expressed ASVs	Total number of over-expressed ASVs	ratio	p-value	significant after BH correction	rank	n	BH-threshold
Litorimonas	15	85	0.176471	1.04634e-08	X	1	52	0.000961538
Yoonia-Loktanella	5	85	0.0588235	7.95059e-06	X	2	52	0.00192308
Escherichia/Shigella	2	85	0.0235294	0.000135908	X	3	52	0.00288462
Flavobacteriaceae_NA	7	85	0.0823529	0.000649585	X	4	52	0.00384615
Paraglaciecola	2	85	0.0235294	0.000868631	X	5	52	0.00480769
Robiginitomaculum	3	85	0.0352941	0.000939338	X	6	52	0.00576923
Portibacter	5	85	0.0588235	0.00105826	X	7	52	0.00673077
Tenacibaculum	5	85	0.0588235	0.00259001	X	8	52	0.00769231
Sulfitobacter	2	85	0.0235294	0.0118264		9	52	0.00865385
Litoreibacter	1	85	0.0117647	0.0139919		10	52	0.00961538
Ulvibacter	1	85	0.0117647	0.0214723		11	52	0.0105769
Tateyamaria	1	85	0.0117647	0.0261994		12	52	0.0115385
Nonlabens	1	85	0.0117647	0.0379045		13	52	0.0125
Blastopirellula	3	85	0.0352941	0.0401896		14	52	0.0134615
Winogradskyella	1	85	0.0117647	0.0402123		15	52	0.0144231
Micavibrionales_NA	2	85	0.0235294	0.0494922		16	52	0.0153846
Octadecabacter	1	85	0.0117647	0.0538009		17	52	0.0163462
Peredibacter	2	85	0.0235294	0.0798222		18	52	0.0173077
Colwellia	1	85	0.0117647	0.0803947		19	52	0.0182692
Acinetobacter	0	85	0	0.101496		20	52	0.0192308
Planctomycetales_NA	0	85	0	0.101496		21	52	0.0201923
Algimonas	0	85	0	0.106066		22	52	0.0211538
Terrilactibacillus	0	85	0	0.106066		23	52	0.0221154
Stenotrophomonas	0	85	0	0.12412		24	52	0.0230769
Parvularculaceae_NA	0	85	0	0.141813		25	52	0.0240385
Gammaproteobacteria_NA	5	85	0.0588235	0.167575		26	52	0.025
Bacteriovoracaceae_NA	0	85	0	0.176145		27	52	0.0259615
Sporolactobacillus	0	85	0	0.196911		28	52	0.0269231
Arenicella	4	85	0.0470588	0.200953		29	52	0.0278846
Cytophagales_NA	0	85	0	0.205071		30	52	0.0288462
Cocleimonas	0	85	0	0.20912		31	52	0.0298077
Sphingorhabdus	0	85	0	0.221147		32	52	0.0307692
Vibrio	0	85	0	0.221147		33	52	0.0317308
Polaribacter	0	85	0	0.252341		34	52	0.0326923
Erythrobacter	0	85	0	0.263717		35	52	0.0336538
Marinicella	0	85	0	0.274923		36	52	0.0346154
Cellvibrionaceae_NA	1	85	0.0117647	0.346016		37	52	0.0355769
Saprospiraceae_NA	9	85	0.105882	0.358782		38	52	0.0365385
Pseudahrensia	0	85	0	0.36848		39	52	0.0375
Thalassotalea	0	85	0	0.36848		40	52	0.0384615
Rhizobiaceae_NA	0	85	0	0.390721		41	52	0.0394231
KI89A_clade	0	85	0	0.400014		42	52	0.0403846
Rhodobacteraceae_NA	3	85	0.0352941	0.441642		43	52	0.0413462
Sva0996_marine_group	0	85	0	0.44442		44	52	0.0423077
Lewinella	0	85	0	0.493437		45	52	0.0432692
Dokdonia	1	85	0.0117647	0.539076		46	52	0.0442308
Rubidimonas	0	85	0	0.547574		47	52	0.0451923
Hellea	0	85	0	0.576833		48	52	0.0461538
Reichenbachiella	0	85	0	0.734011		49	52	0.0471154
Granulosicoccus	2	85	0.0235294	0.830787		50	52	0.0480769
Hyphomonadaceae_NA	0	85	0	0.850502		51	52	0.0490385
Algitalea	0	85	0	0.85735		52	52	0.05
Taxa	Summer
	Number of over-expressed ASVs	Total number of over-expressed ASVs	ratio	p-value	significant after BH correction	rank	n	BH-threshold
Sva0996_marine_group	12	95	0.126316	1.62981e-13	X	1	52	0.000961538
Arenicella	14	95	0.147368	1.95482e-06	X	2	52	0.00192308
KI89A_clade	5	95	0.0526316	2.54938e-05	X	3	52	0.00288462
Dokdonia	9	95	0.0947368	3.52044e-05	X	4	52	0.00384615
Hyphomonadaceae_NA	8	95	0.0842105	0.000267845	X	5	52	0.00480769
Algimonas	2	95	0.0210526	0.000289573	X	6	52	0.00576923
Granulosicoccus	12	95	0.126316	0.00143241	X	7	52	0.00673077
Planctomycetales_NA	1	95	0.0105263	0.00654136	X	8	52	0.00769231
Litorimonas	7	95	0.0736842	0.0108946		9	52	0.00865385
Rubidimonas	3	95	0.0315789	0.0121376		10	52	0.00961538
Pseudahrensia	2	95	0.0210526	0.0150225		11	52	0.0105769
Rhizobiaceae_NA	2	95	0.0210526	0.018283		12	52	0.0115385
Sphingorhabdus	1	95	0.0105263	0.0321456		13	52	0.0125
Tateyamaria	1	95	0.0105263	0.0321456		14	52	0.0134615
Polaribacter	1	95	0.0105263	0.0422539		15	52	0.0144231
Escherichia/Shigella	0	95	0	0.102567		16	52	0.0153846
Acinetobacter	0	95	0	0.112738		17	52	0.0163462
Terrilactibacillus	0	95	0	0.117781		18	52	0.0173077
Stenotrophomonas	0	95	0	0.13767		19	52	0.0182692
Parvularculaceae_NA	0	95	0	0.157115		20	52	0.0192308
Blastopirellula	2	95	0.0210526	0.17383		21	52	0.0201923
Lewinella	1	95	0.0105263	0.175523		22	52	0.0211538
Litoreibacter	0	95	0	0.180812		23	52	0.0221154
Paraglaciecola	0	95	0	0.185472		24	52	0.0230769
Bacteriovoracaceae_NA	0	95	0	0.194713		25	52	0.0240385
Sporolactobacillus	0	95	0	0.217364		26	52	0.025
Ulvibacter	0	95	0	0.221818		27	52	0.0259615
Cytophagales_NA	0	95	0	0.226247		28	52	0.0269231
Cocleimonas	0	95	0	0.230651		29	52	0.0278846
Vibrio	0	95	0	0.243715		30	52	0.0288462
Hellea	1	95	0.0105263	0.248092		31	52	0.0298077
Erythrobacter	0	95	0	0.289764		32	52	0.0307692
Nonlabens	0	95	0	0.289764		33	52	0.0317308
Winogradskyella	0	95	0	0.297833		34	52	0.0326923
Marinicella	0	95	0	0.301834		35	52	0.0336538
Octadecabacter	0	95	0	0.34062		36	52	0.0346154
Robiginitomaculum	0	95	0	0.380825		37	52	0.0355769
Thalassotalea	0	95	0	0.401722		38	52	0.0365385
Yoonia-Loktanella	0	95	0	0.405136		39	52	0.0375
Colwellia	0	95	0	0.408532		40	52	0.0384615
Sulfitobacter	0	95	0	0.408532		41	52	0.0394231
Tenacibaculum	1	95	0.0105263	0.454007		42	52	0.0403846
Gammaproteobacteria_NA	3	95	0.0315789	0.600055		43	52	0.0413462
Micavibrionales_NA	0	95	0	0.601848		44	52	0.0423077
Peredibacter	0	95	0	0.676342		45	52	0.0432692
Portibacter	0	95	0	0.72459		46	52	0.0442308
Rhodobacteraceae_NA	2	95	0.0210526	0.735569		47	52	0.0451923
Cellvibrionaceae_NA	0	95	0	0.747435		48	52	0.0461538
Reichenbachiella	0	95	0	0.772386		49	52	0.0471154
Flavobacteriaceae_NA	0	95	0	0.883206		50	52	0.0480769
Algitalea	0	95	0	0.886557		51	52	0.0490385
Saprospiraceae_NA	5	95	0.0526316	0.928155		52	52	0.05
Taxa	Autumn
	Number of over-expressed ASVs	Total number of over-expressed ASVs	ratio	p-value	significant after BH correction	rank	n	BH-threshold
Litorimonas	26	115	0.226087	0	X	1	52	0.000961538
Tateyamaria	8	115	0.0695652	8.61676e-11	X	2	52	0.00192308
Algitalea	15	115	0.130435	8.58573e-09	X	3	52	0.00288462
Yoonia-Loktanella	4	115	0.0347826	0.000449914	X	4	52	0.00384615
Algimonas	2	115	0.0173913	0.00050649	X	5	52	0.00480769
Octadecabacter	3	115	0.026087	0.00172057	X	6	52	0.00576923
Cytophagales_NA	2	115	0.0173913	0.00386511	X	7	52	0.00673077
Stenotrophomonas	1	115	0.00869565	0.0141591		8	52	0.00769231
Hyphomonadaceae_NA	6	115	0.0521739	0.0142884		9	52	0.00865385
Sulfitobacter	2	115	0.0173913	0.0261992		10	52	0.00961538
Sporolactobacillus	1	115	0.00869565	0.0359178		11	52	0.0105769
Cocleimonas	1	115	0.00869565	0.0405646		12	52	0.0115385
Sphingorhabdus	1	115	0.00869565	0.0454246		13	52	0.0125
Vibrio	1	115	0.00869565	0.0454246		14	52	0.0134615
Erythrobacter	1	115	0.00869565	0.0649034		15	52	0.0144231
Blastopirellula	3	115	0.026087	0.0972364		16	52	0.0153846
Robiginitomaculum	1	115	0.00869565	0.114633		17	52	0.0163462
Escherichia/Shigella	0	115	0	0.122781		18	52	0.0173077
Pseudahrensia	1	115	0.00869565	0.128242		19	52	0.0182692
Acinetobacter	0	115	0	0.134802		20	52	0.0192308
Planctomycetales_NA	0	115	0	0.134802		21	52	0.0201923
Terrilactibacillus	0	115	0	0.140751		22	52	0.0211538
Parvularculaceae_NA	0	115	0	0.186906		23	52	0.0221154
Litoreibacter	0	115	0	0.214496		24	52	0.0230769
Paraglaciecola	0	115	0	0.219902		25	52	0.0240385
Bacteriovoracaceae_NA	0	115	0	0.230603		26	52	0.025
Lewinella	1	115	0.00869565	0.233425		27	52	0.0259615
Arenicella	5	115	0.0434783	0.246081		28	52	0.0269231
Ulvibacter	0	115	0	0.26184		29	52	0.0278846
Rubidimonas	1	115	0.00869565	0.289378		30	52	0.0288462
Micavibrionales_NA	1	115	0.00869565	0.304608		31	52	0.0298077
Hellea	1	115	0.00869565	0.322303		32	52	0.0307692
Polaribacter	0	115	0	0.325272		33	52	0.0317308
Nonlabens	0	115	0	0.339125		34	52	0.0326923
Winogradskyella	0	115	0	0.348204		35	52	0.0336538
Marinicella	0	115	0	0.352696		36	52	0.0346154
Saprospiraceae_NA	12	115	0.104348	0.382053		37	52	0.0355769
Dokdonia	2	115	0.0173913	0.439942		38	52	0.0365385
Thalassotalea	0	115	0	0.463048		39	52	0.0375
Colwellia	0	115	0	0.470438		40	52	0.0384615
Rhodobacteraceae_NA	4	115	0.0347826	0.487		41	52	0.0394231
Rhizobiaceae_NA	0	115	0	0.488473		42	52	0.0403846
Cellvibrionaceae_NA	1	115	0.00869565	0.493764		43	52	0.0413462
KI89A_clade	0	115	0	0.499		44	52	0.0423077
Sva0996_marine_group	0	115	0	0.5485		45	52	0.0432692
Tenacibaculum	1	115	0.00869565	0.554939		46	52	0.0442308
Granulosicoccus	4	115	0.0347826	0.728881		47	52	0.0451923
Flavobacteriaceae_NA	1	115	0.00869565	0.730302		48	52	0.0461538
Peredibacter	0	115	0	0.744761		49	52	0.0471154
Portibacter	0	115	0	0.790067		50	52	0.0480769
Reichenbachiella	0	115	0	0.833324		51	52	0.0490385
Gammaproteobacteria_NA	2	115	0.0173913	0.88284		52	52	0.05
Taxa	Winter				Spring				Summer				Autumn				Entire dataset
	Number of over-expressed ASVs	Total number of over-expressed ASVs	ratio	p-value	Number of over-expressed ASVs	Total number of over-expressed ASVs	ratio	p-value	Number of over-expressed ASVs	Total number of over-expressed ASVs	ratio	p-value	Number of over-expressed ASVs	Total number of over-expressed ASVs	ratio	p-value	Number of ASVs	Total number of ASVs	ratio
Algimonas	0	126	0	0.153129	0	85	0	0.106066	2	95	0.0210526	0.00029 ***	2	115	0.0173913	0.00051 ***	22	16689	0.00131823
Algitalea	4	126	0.031746	0.158698	0	85	0	0.85735	0	95	0	0.886557	15	115	0.130435	<0.00001 ***	378	16689	0.0226496
Arenicella	8	126	0.0634921	0.0425644	4	85	0.0470588	0.200953	14	95	0.147368	<0.00001 ***	5	115	0.0434783	0.246081	611	16689	0.0366109
Cytophagales_NA	0	126	0	0.288375	0	85	0	0.205071	0	95	0	0.226247	2	115	0.0173913	0.00387 **	45	16689	0.00269639
Dokdonia	2	126	0.015873	0.499547	1	85	0.0117647	0.539076	9	95	0.0947368	0.00004 ***	2	115	0.0173913	0.439942	353	16689	0.0211517
Escherichia/Shigella	2	126	0.015873	0.00043 ***	2	85	0.0235294	0.00014 ***	0	95	0	0.102567	0	115	0	0.122781	19	16689	0.00113847
Flavobacteriaceae_NA	3	126	0.0238095	0.311172	7	85	0.0823529	0.00065 ***	0	95	0	0.883206	1	115	0.00869565	0.730302	373	16689	0.0223501
Gammaproteobacteria_NA	20	126	0.15873	<0.00001 ***	5	85	0.0588235	0.167575	3	95	0.0315789	0.600055	2	115	0.0173913	0.88284	729	16689	0.0436815
Granulosicoccus	14	126	0.111111	0.00266 **	2	85	0.0235294	0.830787	12	95	0.126316	0.00143 **	4	115	0.0347826	0.728881	878	16689	0.0526095
Hyphomonadaceae_NA	5	126	0.0396825	0.0617529	0	85	0	0.850502	8	95	0.0842105	0.00027 ***	6	115	0.0521739	0.0142884	369	16689	0.0221104
KI89A_clade	0	126	0	0.53105	0	85	0	0.400014	5	95	0.0526316	0.00003 ***	0	115	0	0.499	100	16689	0.00599197
Litoreibacter	2	126	0.015873	0.00248 **	1	85	0.0117647	0.0139919	0	95	0	0.180812	0	115	0	0.214496	35	16689	0.00209719
Litorimonas	4	126	0.031746	0.371432	15	85	0.176471	<0.00001 ***	7	95	0.0736842	0.0108946	26	115	0.226087	<0.00001 ***	530	16689	0.0317574
Octadecabacter	17	126	0.134921	<0.00001 ***	1	85	0.0117647	0.0538009	0	95	0	0.34062	3	115	0.026087	0.00172 **	73	16689	0.00437414
Paraglaciecola	0	126	0	0.238214	2	85	0.0235294	0.00087 ***	0	95	0	0.185472	0	115	0	0.219902	36	16689	0.00215711
Planctomycetales_NA	0	126	0	0.146703	0	85	0	0.101496	1	95	0.0105263	0.00654 **	0	115	0	0.134802	21	16689	0.00125831
Portibacter	1	126	0.00793651	0.507832	5	85	0.0588235	0.00106 **	0	95	0	0.72459	0	115	0	0.790067	225	16689	0.0134819
Reichenbachiella	10	126	0.0793651	<0.00001 ***	0	85	0	0.734011	0	95	0	0.772386	0	115	0	0.833324	258	16689	0.0154593
Robiginitomaculum	1	126	0.00793651	0.132971	3	85	0.0352941	0.00094 ***	0	95	0	0.380825	1	115	0.00869565	0.114633	84	16689	0.00503326
Sva0996_marine_group	0	126	0	0.581568	0	85	0	0.44442	12	95	0.126316	<0.00001 ***	0	115	0	0.5485	115	16689	0.00689077
Tateyamaria	1	126	0.00793651	0.0534424	1	85	0.0117647	0.0261994	1	95	0.0105263	0.0321456	8	115	0.0695652	<0.00001 ***	49	16689	0.00293607
Tenacibaculum	0	126	0	0.870938	5	85	0.0588235	0.00259 **	1	95	0.0105263	0.454007	1	115	0.00869565	0.554939	269	16689	0.0161184
Yoonia-Loktanella	5	126	0.0396825	0.00007 ***	5	85	0.0588235	0.00001 ***	0	95	0	0.405136	4	115	0.0347826	0.00045 ***	91	16689	0.00545269

## Sheet: Physio
Legend: Taxonomic affiliations at genus level of the ASVs characteristic for healthy and symptoms samples, compared with their occurrence in the entire dataset. P-values are the uncorrected result of a binomial test compared to the entire dataset as a reference. Results are highlighted in green if p < 0.05. The following two tables show the Benjamini and Hochberg correction of the p-values. These…
Taxa	HEALTHY				SYMPTOMS				Entire dataset
	Number of over-expressed ASVs	Total number of over-expressed ASVs	ratio	p-value	Number of over-expressed ASVs	Total number of over-expressed ASVs	ratio	p-value	Number of ASVs	Total number of ASVs	ratio
Alteromonadaceae_NA	0	5	0	0.0255013	1	4	0.25	0.000158234	86	16689	0.00515309
Escherichia/Shigella	1	5	0.2	1.29318e-05	0	4	0	0.00454613	19	16689	0.00113847
Granulosicoccus	1	5	0.2	0.0248787	0	4	0	0.194406	878	16689	0.0526095
KI89A_clade	1	5	0.2	0.000354754	0	4	0	0.0237533	100	16689	0.00599197
Octadecabacter	0	5	0	0.0216802	1	4	0.25	0.00011413	73	16689	0.00437414
Rhodobacteraceae_NA	1	5	0.2	0.0146919	0	4	0	0.150323	666	16689	0.0399065
Tenacibaculum	0	5	0	0.0780355	1	4	0.25	0.00152552	269	16689	0.0161184
Yoonia-Loktanella	0	5	0	0.0269678	1	4	0.25	0.000177097	91	16689	0.00545269
Zobellia	1	5	0.2	0.000119943	0	4	0	0.0138291	58	16689	0.00347534
Taxa	HEALTHY
	Number of over-expressed ASVs	Total number of over-expressed ASVs	ratio	p-value	significant after BH correction	rank	n	BH-threshold
Escherichia/Shigella	1	5	0.2	1.29318e-05	X	1	9	0.00555556
Zobellia	1	5	0.2	0.000119943	X	2	9	0.0111111
KI89A_clade	1	5	0.2	0.000354754	X	3	9	0.0166667
Rhodobacteraceae_NA	1	5	0.2	0.0146919	X	4	9	0.0222222
Octadecabacter	0	5	0	0.0216802	X	5	9	0.0277778
Granulosicoccus	1	5	0.2	0.0248787	X	6	9	0.0333333
Alteromonadaceae_NA	0	5	0	0.0255013	X	7	9	0.0388889
Yoonia-Loktanella	0	5	0	0.0269678	X	8	9	0.0444444
Tenacibaculum	0	5	0	0.0780355		9	9	0.05
Taxa	SYMPTOMS
	Number of over-expressed ASVs	Total number of over-expressed ASVs	ratio	p-value	significant after BH correction	rank	n	BH-threshold
Octadecabacter	1	4	0.25	0.00011413	X	1	9	0.00555556
Alteromonadaceae_NA	1	4	0.25	0.000158234	X	2	9	0.0111111
Yoonia-Loktanella	1	4	0.25	0.000177097	X	3	9	0.0166667
Tenacibaculum	1	4	0.25	0.00152552	X	4	9	0.0222222
Escherichia/Shigella	0	4	0	0.00454613	X	5	9	0.0277778
Zobellia	0	4	0	0.0138291	X	6	9	0.0333333
KI89A_clade	0	4	0	0.0237533	X	7	9	0.0388889
Rhodobacteraceae_NA	0	4	0	0.150323		8	9	0.0444444
Granulosicoccus	0	4	0	0.194406		9	9	0.05
Taxa	Overrepresented in
	HEALTHY	p-value	SYMPTOMS	p-value
Escherichia/Shigella	X	0.00001 ***
Granulosicoccus	X	0.02488 *
KI89A_clade	X	0.00035 ***
Rhodobacteraceae_NA	X	0.01469 **
Zobellia	X	0.00012 ***
Alteromonadaceae_NA			X	0.00016 ***
Octadecabacter			X	0.00011 ***
Tenacibaculum			X	0.00153 ***
Yoonia-Loktanella			X	0.00018 ***
